# Supplementary material
Source: PubMed Central journal article supplement (PMC4577383)
Supplement: supp_pp.15.00350_PP2015-00350R2_Supplemental_Table_S4.pdf [file supp_pp.15.00350_PP2015-00350R2_Supplemental_Table_S4.pdf]

**Supplemental Table S4.**

Members of the AP2/ERF family found differentially expressed in the RNA-seq experiment.

|                 |                 |
|-----------------|-----------------|
| Medtr4g130270   | contig_170651_1 |
| Medtr3g072610   | contig_174732_1 |
| Medtr5g058470   | contig_66622_1  |
| Medtr5g053920   | AC233556_27     |
| contig_9246_1   | contig_128232_1 |
| Medtr4g065370   | contig_177605_1 |
| Medtr4g127930   | contig_67698_2  |
| Medtr5g031880   | Medtr1g040430   |
| Medtr7g080460   | Medtr1g043350   |
| Medtr1g093600   | Medtr1g090290   |
| Medtr7g070220   | Medtr2g015040   |
| contig_120479_2 | Medtr4g100420   |
| Medtr2g014300   | contig_56456_1  |
| contig_10108_1  | contig_52681_1  |
| contig_114898_1 | Medtr4g111920   |
| contig_168116_1 | Medtr4g112490   |
| contig_66348_1  | Medtr6g012970   |
| contig_75657_2  | Medtr7g085810   |
| contig_90427_1  | contig_55109_1  |
| Medtr3g090760   | contig_9054_1   |
| contig_105147_1 | contig_169071_1 |
| contig_79289_1  | Medtr4g078710   |
| contig_82104_1  | contig_18329_1  |
| Medtr2g015050   | Medtr4g119270   |
| contig_9736_1   | Medtr7g020980   |
| contig_104468_1 | Medtr7g021010   |
| contig_113760_1 | contig_70694_1  |
| contig_17822_1  | contig_74457_1  |
| Medtr4g086190   | Medtr4g100380   |
| contig_115217_1 | Medtr7g046260   |
| contig_76531_1  | Medtr5g009410   |
| contig_81134_1  | Medtr1g098460   |
| Medtr1g087920   | Medtr3g095190   |
| Medtr2g019750   | Medtr1g090170   |
| Medtr4g086160   | Medtr3g098580   |
| contig_16415_1  | Medtr1g012470   |
| Medtr1g019110   | Medtr8g013860   |
| Medtr4g035430   | Medtr2g103700   |
| contig_163627_1 |                 |
