# Supplementary material
Source: PubMed Central journal article supplement (PMC4577383)
Supplement: supp_pp.15.00350_PP2015-00350R2_Supplemental_Table_S5.pdf [file supp_pp.15.00350_PP2015-00350R2_Supplemental_Table_S5.pdf]

| MERLIN Cluster ID | Primary Group | General description                                                                                       | Inflection time point (hpi) | Number of genes with $\geq 2$ increase in <i>skl</i> relative to <i>skl</i> T=0 (G1, G2, G3) or a $\geq 2$ fold decrease in <i>skl</i> relative to A17 (G4). | Response type                                                                                           | Number of genes | Regulation by (Nod Factor/ET) |
|-------------------|---------------|-----------------------------------------------------------------------------------------------------------|-----------------------------|--------------------------------------------------------------------------------------------------------------------------------------------------------------|---------------------------------------------------------------------------------------------------------|-----------------|-------------------------------|
| 227               | G1, G2, G3    | Contains known symbiosis-related genes. Kinases and TF genes over-represented                             | 6-24hpi                     | 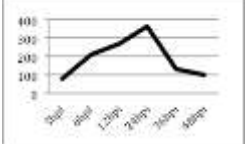                                                                          | Nod factor-induced, ET-repressed                                                                        | 1318            | ↑/↓                           |
| 230               | G1, G3        | Genes related to DNA synthesis, development and protein synthesis/degradation                             | 12-24hpi                    |                                                                           | Nod factor-induced, ET-repressed                                                                        | 745             | ↑/↓                           |
| 207               | G1, G2        | Contains many genes of unknown function, regulation of transcription and development                      | 36-48                       |                                                                           | Nod factor-induced, ET-repressed                                                                        | 49              | ↑/↓                           |
| 184               | G4            | DUF- and LRR-receptor kinases, genes involved in biotic stress responses                                  | 0.5, 6hpi                   |                                                                           | Mix of early NF dependent and independent induction that require ET                                     | 54              | - , ↑/↑                       |
| 217               | G4            | Contains pathogen-related genes, genes involved in biotic stress responses, plus many of unknown function | 24-48hpi                    |                                                                          | Early NF and ET independent induction preceding later ET dependent expression.                          | 244             | - / ↑                         |
| 223               | G4            | ET receptors, ACO, and pathogen-related responses                                                         | 0-0.5, 6hpi                 |                                                                         | Biphasic ET-dependent induction. Early peak is NF independent, late peak is NF dependent.               | 82              | - , ↑/↑                       |
| 246               | G4            | Genes involved in cell wall degradation, hormone and lipid metabolism, stress responses, transport        | 0.5, 24-48hpi               |                                                                         | Low basal expression in <i>skl</i> , expression declines at later timepoints. Some genes induced by NF. | 528             | - / ↑                         |

|     |    |                                                                             |          |  |                                                       |     |     |
|-----|----|-----------------------------------------------------------------------------|----------|--|-------------------------------------------------------|-----|-----|
| 229 | G4 | Genes related to secondary metabolism, hormone and abiotic stress responses | 24-36hpi |  | Expression declines in <i>skl</i> at later timepoints | 162 | -/↑ |
| 137 | G4 | UDP-glucosyltransferases, lipid and ABC transporters, nodulins              | 24-48    |  | Expression declines in <i>skl</i> at later timepoints | 54  | -/↑ |
